# Supplementary material for: Influence of Genetic Variation on Plasma Protein Levels in Older Adults Using a Multi-Analyte Panel
Source: PLoS One. 2013 Jul 23;8(7):e70269. doi: 10.1371/journal.pone.0070269 (PMC3720913; doi:10.1371/journal.pone.0070269)
Supplement: Table S1 — Annotation information for the original 190 proteins in RBM Human DiscoveryMap panel (v.1.0). Three columns, “LOGTRANS”, “Tested”, and “Identified”, indicate if analytes were log-transformed, which associations were investigated, and which associations were identified as significant in the ADNI cohort, respectively. The last column, “Replicated”, indicates which associations were significantly replicated in the IMAS cohort. (XLSX) [file pone.0070269.s003.xlsx]

## Sheet: Sheet1
Analyte Symbol	Protein Name	Swiss-Prot Accession Number	Unit	LOGTRANS in ADNI	Gene Symbol	Gene Name	CHR	Tested	Identified	Replicated
CD5L	CD5 Antigen-like	O43866	ng/ml	1	CD5L	CD5 molecule-like	1	1	1	1
CompFactH	Complement Factor H**	P08603**	ug/ml	0	CFH**	complement factor H	1	1	1	1
CompFactH	Complement Factor H-related Protein 1***	Q03591***	ug/ml	0	CFHR1***	complement factor H-related 1	1	1	1	1
IL-6r	Interleukin-6 receptor	P08887	ng/mL	1	IL6R	interleukin 6 receptor	1	1	1	1
Fetuin-A	Fetuin-A	P02765	ug/ml	1	AHSG	alpha-2-HS-glycoprotein	3	1	1	1
ApoA-IV	Apolipoprotein A-IV	P06727	ug/ml	1	APOA4	apolipoprotein A-IV	11	1	1	1
FactorVII	Factor VII	P08709	ng/mL	1	F7	coagulation factor VII	13	1	1	1
IL-16	Interleukin-16	Q14005	pg/mL	1	IL16	interleukin 16 (lymphocyte chemoattractant factor)	15	1	1	1
ACE	Angiotensin-Converting Enzyme	P12821	ng/ml	1	ACE	angiotensin I converting enzyme (peptidyl-dipeptidase A) 1	17	1	1	1
ApoH	Apolipoprotein H	P02749	ug/mL	0	APOH	apolipoprotein H (beta-2-glycoprotein I)	17	1	1	1
HCC-4	Chemokine CC-4	O15467	ng/mL	1	CCL16	chemokine (C-C motif) ligand 16	17	1	1	1
PARC	Pulmonary and Activation-Regulated Chemokine	P55774	ng/mL	1	CCL18	chemokine (C-C motif) ligand 18 (pulmonary and activation-regulated)	17	1	1	1
CD40	CD 40 antigen	Q6P2H9	ng/mL	1	CD40	CD40 molecule, TNF receptor superfamily member 5	20	1	1	1
Angiotensinogen	Angiotensinogen	P01019	ng/mL	1	AGT	angiotensinogen (serpin peptidase inhibitor, clade A, member 8)	1	1	1	0
AFP	Alpha-Fetoprotein	P02771	ng/mL	1	AFP	alpha-fetoprotein	4	1	1	0
GST-alpha	Glutathione S-Transferase alpha	P08263	ng/ml	1	GSTA1	glutathione S-transferase alpha 1	6	1	1	0
LPa	Apolipoprotein(a)	P08519	ug/mL	1	LPA	lipoprotein, Lp(a)	6	1	1	0
EGFR	Epidermal Growth Factor Receptor	P00533	ng/mL	0	EGFR	epidermal growth factor receptor	7	1	1	0
Nr-CAM	Neuronal Cell Adhesion Molecule	Q92823	ng/mL	1	NRCAM	neuronal cell adhesion molecule	7	1	1	0
FAS	FASLG Receptor	P25445	ng/mL	1	FAS	Fas (TNF receptor superfamily, member 6)	10	1	1	0
AAT	Alpha-1-Antitrypsin	P01009	mg/mL	1	SERPINA1	serpin peptidase inhibitor, clade A (alpha-1 antiproteinase, antitrypsin), member 1	14	1	1	0
THP	Tamm-Horsfall Urinary Glycoprotein	P07911	ug/ml	1	UMOD	uromodulin	16	1	1	0
MCP-2	Monocyte Chemotactic Protein 2	P80075	pg/ml	1	CCL8	chemokine (C-C motif) ligand 8	17	1	1	0
MPIF-1	Myeloid Progenitor Inhibitory Factor 1	P55773	ng/mL	1	CCL23	chemokine (C-C motif) ligand 23	17	1	1	0
ApoE	Apolipoprotein E	P02649	ug/ml	1	APOE	apolipoprotein E	19	1	1	0
ICAM-1	Intercellular Adhesion Molecule 1	P05362	ng/mL	1	ICAM1	intercellular adhesion molecule 1	19	1	1	0
Cystatin-C	Cystatin-C	P01034	ng/ml	1	CST3	cystatin C	20	1	1	0
TBG	Thyroxine-Binding Globulin	P05543	ug/mL	1	SERPINA7	serpin peptidase inhibitor, clade A (alpha-1 antiproteinase, antitrypsin), member 7	X	1	1	0
ApoA-II	Apolipoprotein A-II	P02652	ng/ml	1	APOA2	apolipoprotein A-II	1	1	0	0
BNP	Brain Natriuretic Peptide	P16860	pg/ml	1	NPPB	natriuretic peptide B	1	1	0	0
CRP	C-Reactive Protein	P02741	ug/mL	1	CRP	C-reactive protein, pentraxin-related	1	1	0	0
E-Selectin	E-Selectin	P16581	ng/mL	0	SELE	selectin E	1	1	0	0
FABP-heart	Fatty Acid-Binding Protein, heart	P05413	ng/mL	1	FABP3	fatty acid binding protein 3, muscle and heart (mammary-derived growth inhibitor)	1	1	0	0
FasL	Fas Ligand	P48023	pg/mL	1	FASLG	Fas ligand (TNF superfamily, member 6)	1	1	0	0
M-CSF	Macrophage Colony-Stimulating Factor 1	P09603	ng/mL	1	CSF1	colony stimulating factor 1 (macrophage)	1	1	0	0
SAP	Serum Amyloid P-Component	P02743	ug/mL	1	APCS	amyloid P component, serum	1	1	0	0
Sortilin	Sortilin	Q99523	ng/mL	1	SORT1	sortilin 1	1	1	0	0
TNFR2	Tumor Necrosis Factor Receptor-Like 2	Q92956**	ng/mL	1	TNFRSF14**	tumor necrosis factor receptor superfamily, member 14 (herpesvirus entry mediator)	1	1	0	0
TNFR2	Tumor Necrosis Factor Receptor-Like 2	P20333***	ng/mL	1	TNFRSF1B***	tumor necrosis factor receptor superfamily, member 1B	1	1	0	0
TSH*	Thyroid-Stimulating Hormone	P01222	uIU/mL	1	TSHB	thyroid stimulating hormone, beta	1	1	0	0
VCAM-1	Vascular Cell Adhesion Molecule-1	P19320	ng/mL	1	VCAM1	vascular cell adhesion molecule 1	1	1	0	0
ApoB	Apolipoprotein B	P04114	ug/ml	1	APOB	apolipoprotein B (including Ag(x) antigen)	2	1	0	0
Cortisol*	Cortisol		ng/ml	1	POMC	proopiomelanocortin	2	1	0	0
IGFBP-2	Insulin-like Growth Factor-Binding Protein 2	P18065	ng/mL	1	IGFBP2	insulin-like growth factor binding protein 2, 36kDa	2	1	0	0
MIP-3-alpha	Macrophage Inflammatory Protein-3 alpha	P78556	pg/ml	1	CCL20	chemokine (C-C motif) ligand 20	2	1	0	0
Adiponectin	Adiponectin	Q15848	ug/mL	1	ADIPOQ	adiponectin, C1Q and collagen domain containing	3	1	0	0
ApoD	Apolipoprotein D	P05090	ug/ml	1	APOD	apolipoprotein D	3	1	0	0
PAP	Prostatic Acid Phosphatase	P15309	ng/mL	1	ACPP	acid phosphatase, prostate	3	1	0	0
Thrombopoietin	Thrombopoietin	P40225	ng/mL	0	THPO	thrombopoietin	3	1	0	0
Transferrin	Serotransferrin	P02787	mg/dl	1	TF	transferrin	3	1	0	0
VKDPS	Vitamin K-Dependent Protein S	P07225	ug/ml	1	PROS1	protein S (alpha)	3	1	0	0
BLC	B Lymphocyte Chemoattractant	O43927	pg/ml	1	CXCL13	chemokine (C-X-C motif) ligand 13	4	1	0	0
BTC	Betacellulin	P35070	pg/mL	1	BTC	betacellulin	4	1	0	0
CA-19-9	Cancer Antigen 19-9	Q9BXJ9	U/mL	1	NAA15	N(alpha)-acetyltransferase 15, NatA auxiliary subunit	4	1	0	0
EGF	Epidermal Growth Factor	P01133	pg/mL	1	EGF	epidermal growth factor	4	1	0	0
ENA-78	Epithelial-Derived Neutrophil-Activating Protein 78	P42830	ng/mL	1	CXCL5	chemokine (C-X-C motif) ligand 5	4	1	0	0
Fibrinogen*	Fibrinogen	P02671	mg/mL	0	FGA	fibrinogen alpha chain	4	1	0	0
Fibrinogen*	Fibrinogen	P02675	mg/mL	0	FGB	fibrinogen beta chain	4	1	0	0
Fibrinogen*	Fibrinogen	P02679	mg/mL	0	FGG	fibrinogen gamma chain	4	1	0	0
GRO-alpha	Growth-Regulated alpha protein	P09341	pg/mL	1	CXCL1	chemokine (C-X-C motif) ligand 1 (melanoma growth stimulating activity, alpha)	4	1	0	0
IL-8	Interleukin-8	P10145	pg/mL	1	IL8	interleukin 8	4	1	0	0
IP-10	Interferon gamma Induced Protein 10	P02778	pg/ml	1	CXCL10	chemokine (C-X-C motif) ligand 10	4	1	0	0
MIG	Monokine Induced by Gamma Interferon	Q07325	pg/ml	1	CXCL9	chemokine (C-X-C motif) ligand 9	4	1	0	0
Osteopontin	Osteopontin	P10451	ng/ml	1	SPP1	secreted phosphoprotein 1	4	1	0	0
HB-EGF	Heparin-Binding EGF-Like Growth Factor	Q99075	pg/mL	1	HBEGF	heparin-binding EGF-like growth factor	5	1	0	0
IL-13	Interleukin-13	P35225	pg/mL	1	IL13	interleukin 13	5	1	0	0
IL-3	Interleukin-3	P08700	ng/mL	1	IL3	interleukin 3 (colony-stimulating factor, multiple)	5	1	0	0
KIM-1	Kidney Injury Molecule-1	Q96D42	ng/ml	1	HAVCR1	hepatitis A virus cellular receptor 1	5	1	0	0
BMP-6	Bone Morphogenetic Protein 6	P22004	ng/mL	1	BMP6	bone morphogenetic protein 6	6	1	0	0
FSH*	Follicle-Stimulating Hormone	P01215	mIU/mL	1	CGA	glycoprotein hormones, alpha polypeptide	6	1	0	0
LH*	Luteinizing Hormone	P01215	mIU/mL	1	CGA	glycoprotein hormones, alpha polypeptide	6	1	0	0
PRL	Prolactin	P01236	ng/ml	1	PRL	prolactin	6	1	0	0
RAGE	Receptor for advanced glycosylation end products	Q15109	ng/mL	1	AGER	advanced glycosylation end product-specific receptor	6	1	0	0
TNF-alpha	Tumor Necrosis Factor alpha	P01375	pg/mL	1	TNF	tumor necrosis factor	6	1	0	0
TSH*	Thyroid-Stimulating Hormone	P01215	uIU/mL	1	CGA	glycoprotein hormones, alpha polypeptide	6	1	0	0
VEGF	Vascular Endothelial Growth Factor	P15692	pg/mL	1	VEGFA	vascular endothelial growth factor A	6	1	0	0
Eotaxin-3	Eotaxin-3	Q9Y258	pg/mL	1	CCL26	chemokine (C-C motif) ligand 26	7	1	0	0
HGF	Hepatocyte Growth Factor	P14210	ng/mL	1	HGF	hepatocyte growth factor (hepapoietin A; scatter factor)	7	1	0	0
Leptin	Leptin	P41159	ng/mL	1	LEP	leptin	7	1	0	0
PAI-1	Plasminogen Activator Inhibitor 1	P05121	ng/mL	1	SERPINE1	serpin peptidase inhibitor, clade E (nexin, plasminogen activator inhibitor type 1), member 1	7	1	0	0
ANG-2	Angiopoietin-2	O15123	ng/mL	1	ANGPT2	angiopoietin 2	8	1	0	0
CLU	Clusterin	P10909	ug/ml	1	CLU	clusterin	8	1	0	0
Cortisol*	Cortisol		ng/ml	1	CRH	corticotropin releasing hormone	8	1	0	0
TRAIL-R3	TNF-Related Apoptosis-Inducing Ligand Receptor 3	O14798	ng/mL	1	TNFRSF10C	tumor necrosis factor receptor superfamily, member 10c, decoy without an intracellular domain	8	1	0	0
A1Micro	Alpha-1-Microglobulin	P02760	ug/ml	1	AMBP	alpha-1-microglobulin/bikunin precursor	9	1	0	0
NGAL	Neutrophil Gelatinase-Associated Lipocalin	P80188	ng/ml	1	LCN2	lipocalin 2	9	1	0	0
PAPP-A	Pregnancy-Associated Plasma Protein A	Q13219	mIU/mL	1	PAPPA	pregnancy-associated plasma protein A, pappalysin 1	9	1	0	0
TN-C	Tenascin-C	P24821	ng/mL	1	TNC	tenascin C	9	1	0	0
SGOT	Serum Glutamic Oxaloacetic Transaminase	P17174	ug/mL	0	GOT1	glutamic-oxaloacetic transaminase 1, soluble (aspartate aminotransferase 1)	10	1	0	0
ApoA-I	Apolipoprotein A-I	P02647	mg/mL	1	APOA1	apolipoprotein A-I	11	1	0	0
BDNF	Brain-Derived Neurotrophic Factor	P23560	ng/mL	1	BDNF	brain-derived neurotrophic factor	11	1	0	0
Calcitonin	Calcitonin	P01258	pg/mL	1	CALCA	calcitonin-related polypeptide alpha	11	1	0	0
CNTF	Ciliary Neurotrophic Factor	P26441	pg/mL	1	CNTF	ciliary neurotrophic factor	11	1	0	0
FGF-4	Fibroblast Growth Factor 4	P08620	pg/mL	1	FGF4	fibroblast growth factor 4	11	1	0	0
FSH*	Follicle-Stimulating Hormone	P01225	mIU/mL	1	FSHB	follicle stimulating hormone, beta polypeptide	11	1	0	0
IL-18	Interleukin-18	Q14116	pg/mL	1	IL18	interleukin 18 (interferon-gamma-inducing factor)	11	1	0	0
MMP-1	Matrix Metalloproteinase-1	P03956	ng/ml	1	MMP1	matrix metallopeptidase 1 (interstitial collagenase)	11	1	0	0
MMP-10	Matrix Metalloproteinase-10	P09238	ng/ml	1	MMP10	matrix metallopeptidase 10 (stromelysin 2)	11	1	0	0
MMP-7	Matrix Metalloproteinase-7	P09237	ng/ml	1	MMP7	matrix metallopeptidase 7 (matrilysin, uterine)	11	1	0	0
A2Macro	Alpha-2-Macroglobulin	P01023	mg/mL	1	A2M	alpha-2-macroglobulin	12	1	0	0
SCF	Stem Cell Factor	P21583	pg/mL	1	KITLG	KIT ligand	12	1	0	0
vWF	von Willebrand Factor	P04275	ug/mL	1	VWF	von Willebrand factor	12	1	0	0
AACT	Alpha-1-Antichymotrypsin	P01011	ug/ml	1	SERPINA3	serpin peptidase inhibitor, clade A (alpha-1 antiproteinase, antitrypsin), member 3	14	1	0	0
CgA	Chromogranin-A	P10645	ng/mL	1	CHGA	chromogranin A (parathyroid secretory protein 1)	14	1	0	0
PLGF	Placenta Growth Factor	P49763	pg/ml	0	PGF	placental growth factor	14	1	0	0
B2M	Beta-2-Microglobulin	P61769	ug/mL	1	B2M	beta-2-microglobulin	15	1	0	0
Thrombospondin-1	Thrombospondin-1	P07996	ng/mL	1	THBS1	thrombospondin 1	15	1	0	0
Haptoglobin	Haptoglobin	P00738	mg/mL	1	HP	haptoglobin	16	1	0	0
MDC	Macrophage-Derived Chemokine	O00626	pg/mL	1	CCL22	chemokine (C-C motif) ligand 22	16	1	0	0
MMP-2	Matrix Metalloproteinase-2	P08253	ng/mL	1	MMP2	matrix metallopeptidase 2 (gelatinase A, 72kDa gelatinase, 72kDa type IV collagenase)	16	1	0	0
Eotaxin-1	Eotaxin-1	P51671	pg/mL	1	CCL11	chemokine (C-C motif) ligand 11	17	1	0	0
GH	Growth Hormone	P01241	ng/mL	1	GH1	growth hormone 1	17	1	0	0
I-309	T Lymphocyte-Secreted Protein I-309	P22362	pg/mL	1	CCL1	chemokine (C-C motif) ligand 1	17	1	0	0
MCP-1	Monocyte Chemotactic Protein 1	P13500	pg/mL	1	CCL2	chemokine (C-C motif) ligand 2	17	1	0	0
MCP-3	Monocyte Chemotactic Protein 3	P80098	pg/mL	1	CCL7	chemokine (C-C motif) ligand 7	17	1	0	0
MCP-4	Monocyte Chemotactic Protein 4	Q99616	pg/ml	1	CCL13	chemokine (C-C motif) ligand 13	17	1	0	0
MIP-1-alpha	Macrophage Inflammatory Protein-1 alpha	P10147	pg/mL	1	CCL3	chemokine (C-C motif) ligand 3	17	1	0	0
MIP-1-beta	Macrophage Inflammatory Protein-1 beta	P13236	pg/mL	1	CCL4	chemokine (C-C motif) ligand 4	17	1	0	0
MPO	Myeloperoxidase	P05164	ng/mL	1	MPO	myeloperoxidase	17	1	0	0
PPP	Pancreatic Polypeptide	P01298	pg/ml	1	PPY	pancreatic polypeptide	17	1	0	0
PYY	Peptide YY	P10082	pg/mL	1	PYY	peptide YY	17	1	0	0
RANTES	T-Cell-Specific Protein RANTES	P13501	ng/mL	1	CCL5	chemokine (C-C motif) ligand 5	17	1	0	0
SHBG	Sex Hormone-Binding Globulin	P04278	nmol/L	1	SHBG	sex hormone-binding globulin	17	1	0	0
TTR	Transthyretin	P02766	mg/dl	1	TTR	transthyretin	18	1	0	0
AXL	AXL Receptor Tyrosine Kinase	P30530	ng/mL	1	AXL	AXL receptor tyrosine kinase	19	1	0	0
C3	Complement C3	P01024	mg/mL	1	C3	complement component 3	19	1	0	0
CEA	Carcinoembryonic Antigen	P06731	ng/mL	1	CEACAM5	carcinoembryonic antigen-related cell adhesion molecule 5	19	1	0	0
CK-MB*	Creatine Kinase-MB	P06732	ng/mL	1	CKM	creatine kinase, muscle	19	1	0	0
LH*	Luteinizing Hormone	P01229	mIU/mL	1	LHB	luteinizing hormone beta polypeptide	19	1	0	0
Resistin	Resistin	Q9HD89	ng/ml	1	RETN	resistin	19	1	0	0
TECK	Thymus-Expressed Chemokine	O15444	ng/mL	1	CCL25	chemokine (C-C motif) ligand 25	19	1	0	0
MMP-9	Matrix Metalloproteinase-9	P14780	ng/mL	1	MMP9	matrix metallopeptidase 9 (gelatinase B, 92kDa gelatinase, 92kDa type IV collagenase)	20	1	0	0
MMP-9-total	Matrix Metalloproteinase-9, total	P14780	ng/ml	1	MMP9	matrix metallopeptidase 9 (gelatinase B, 92kDa gelatinase, 92kDa type IV collagenase)	20	1	0	0
TM	Thrombomodulin	P07204	ng/ml	1	THBD	thrombomodulin	20	1	0	0
SOD-1	Superoxide Dismutase 1, soluble	P00441	ng/mL	1	SOD1	superoxide dismutase 1, soluble	21	1	0	0
TFF3	Trefoil Factor 3	Q07654	ug/ml	1	TFF3	trefoil factor 3 (intestinal)	21	1	0	0
MIF	Macrophage Migration Inhibitory Factor	P14174	ng/mL	1	MIF	macrophage migration inhibitory factor (glycosylation-inhibiting factor)	22	1	0	0
Myoglobin	Myoglobin	P02144	ng/mL	1	MB	myoglobin	22	1	0	0
PDGF-BB	Platelet-Derived Growth Factor BB	P01127	pg/ml	1	PDGFB	platelet-derived growth factor beta polypeptide	22	1	0	0
CD40-L	CD40 Ligand	P29965	ng/mL	1	CD40LG	CD40 ligand	X	1	0	0
EN-RAGE	EN-RAGE	P80511	ng/mL	1	S100A12	S100 calcium binding protein A12	1	0	0	0
IL-10	Interleukin-10	P22301	pg/mL	1	IL10	interleukin 10	1	0	0	0
Lymphotactin	Lymphotactin	P47992	ng/mL	1	XCL1	chemokine (C motif) ligand 1	1	0	0	0
NGF-beta	Nerve Growth Factor beta	P01138	ng/mL	1	NGF	nerve growth factor (beta polypeptide)	1	0	0	0
TF	Tissue Factor	P13726	ng/mL	1	F3	coagulation factor III (thromboplastin, tissue factor)	1	0	0	0
ACTH	Adrenocorticotropic Hormone	P01189	ng/mL	1	POMC	proopiomelanocortin	2	0	0	0
GLP-1-total	Glucagon-like Peptide 1, total	P01275	pg/ml	1	GCG	glucagon	2	0	0	0
Glucagon	Glucagon	P01275	pg/ml	1	GCG	glucagon	2	0	0	0
HSP-60	Heat Shock Protein 60	P10809	ng/ml	1	HSPD1	heat shock 60kDa protein 1 (chaperonin)	2	0	0	0
IL-1-alpha	Interleukin-1 alpha	P01583	ng/mL	1	IL1A	interleukin 1, alpha	2	0	0	0
IL-1-beta	Interleukin-1 beta	P01584	pg/mL	1	IL1B	interleukin 1, beta	2	0	0	0
IL-1ra	Interleukin-1 receptor antagonist	P18510	pg/mL	1	IL1RN	interleukin 1 receptor antagonist	2	0	0	0
TGF-alpha	Transforming Growth Factor alpha	P01135	pg/mL	1	TGFA	transforming growth factor, alpha	2	0	0	0
IL-12p70	Interleukin-12 Subunit p70	P29459	pg/mL	1	IL12A	interleukin 12A (natural killer cell stimulatory factor 1, cytotoxic lymphocyte maturation factor 1, p35)	3	0	0	0
AR*	Amphiregulin	P15514	pg/mL	1	AREG	amphiregulin	4	0	0	0
AR*	Amphiregulin		pg/mL	1	AREGB	amphiregulin B	4	0	0	0
EPR	Epiregulin	O14944	pg/mL	1	EREG	epiregulin	4	0	0	0
FGF-basic	Fibroblast Growth Factor basic	P09038	pg/mL	1	FGF2	fibroblast growth factor 2 (basic)	4	0	0	0
IL-15	Interleukin-15	P40933	ng/mL	1	IL15	interleukin 15	4	0	0	0
IL-2	Interleukin-2	P60568	pg/mL	1	IL2	interleukin 2	4	0	0	0
GM-CSF	Granulocyte-Macrophage Colony-Stimulating Factor	P04141	pg/mL	1	CSF2	colony stimulating factor 2 (granulocyte-macrophage)	5	0	0	0
IL-12p40	Interleukin-12 Subunit p40	P29460	ng/mL	0	IL12B	interleukin 12B (natural killer cell stimulatory factor 2, cytotoxic lymphocyte maturation factor 2, p40)	5	0	0	0
IL-4	Interleukin-4	P05112	pg/mL	1	IL4	interleukin 4	5	0	0	0
IL-5	Interleukin-5	P05113	pg/mL	1	IL5	interleukin 5 (colony-stimulating factor, eosinophil)	5	0	0	0
CTGF	Connective Tissue Growth Factor	P29279	ng/ml	1	CTGF	connective tissue growth factor	6	0	0	0
ET-1	Endothelin-1	P05305	pg/mL	1	EDN1	endothelin 1	6	0	0	0
TNF-beta	Tumor Necrosis Factor beta	P01374	pg/mL	1	LTA	lymphotoxin alpha (TNF superfamily, member 1)	6	0	0	0
EPO	Erythropoietin	P01588	pg/mL	1	EPO	erythropoietin	7	0	0	0
IL-6	Interleukin-6	P05231	pg/mL	1	IL6	interleukin 6 (interferon, beta 2)	7	0	0	0
Calbindin	Calbindin	P05937	ng/ml	1	CALB1	calbindin 1, 28kDa	8	0	0	0
IL-7	Interleukin-7	P13232	pg/mL	1	IL7	interleukin 7	8	0	0	0
ApoC-III	Apolipoprotein C-III	P02656	ug/mL	1	APOC3	apolipoprotein C-III	11	0	0	0
C-peptide	C-Peptide	P01308	ng/ml	1	INS	insulin	11	0	0	0
FRTN*	Ferritin	P02794	ng/mL	1	FTH1	ferritin, heavy polypeptide 1	11	0	0	0
Insulin	Insulin	P01308	uIU/mL	1	INS	insulin	11	0	0	0
MMP-3	Matrix Metalloproteinase-3	P08254	ng/mL	1	MMP3	matrix metallopeptidase 3 (stromelysin 1, progelatinase)	11	0	0	0
Proinsulin-Intact	Proinsulin, Intact	P01308	pM	1	INS	insulin	11	0	0	0
Proinsulin-Total	Proinsulin, Total	P01308	pM	1	INS	insulin	11	0	0	0
Secretin	Secretin	P09683	ng/mL	1	SCT	secretin	11	0	0	0
IFN-gamma	Interferon gamma	P01579	pg/mL	1	IFNG	interferon, gamma	12	0	0	0
IGF-I	Insulin-like Growth Factor I	P01343	ng/mL	1	IGF1	insulin-like growth factor 1 (somatomedin C)	12	0	0	0
LOX-1	Lectin-Like Oxidized LDL Receptor 1	P78380	ng/mL	1	OLR1	oxidized low density lipoprotein (lectin-like) receptor 1	12	0	0	0
CK-MB*	Creatine Kinase-MB	P12277	ng/mL	1	CKB	creatine kinase, brain	14	0	0	0
IL-25	Interleukin-25	Q9H293	pg/mL	1	IL25	interleukin 25	14	0	0	0
TGF-beta-3	Transforming Growth Factor beta-3	P10600	pg/mL	1	TGFB3	transforming growth factor, beta 3	14	0	0	0
AGRP	Agouti-Related Protein	O00253	pg/mL	1	AGRP	agouti related protein homolog	16	0	0	0
G-CSF	Granulocyte Colony-Stimulating Factor	P09919	pg/mL	1	CSF3	colony stimulating factor 3 (granulocyte)	17	0	0	0
Vitronectin	Vitronectin	P04004	ug/ml	1	VTN	vitronectin	17	0	0	0
ApoC-I	Apolipoprotein C-I	P02654	ng/ml	1	APOC1	apolipoprotein C-I	19	0	0	0
CA-125	Cancer Antigen 125	Q8WXI7	U/mL	1	MUC16	mucin 16, cell surface associated	19	0	0	0
FRTN*	Ferritin	P02792	ng/mL	1	FTL	ferritin, light polypeptide	19	0	0	0
IL-11	Interleukin-11	P20809	pg/mL	1	IL11	interleukin 11	19	0	0	0
PSA-f	Prostate-Specific Antigen, Free	P07288	ng/mL	1	KLK3	kallikrein-related peptidase 3	19	0	0	0
S100-B	S100 calcium-binding protein B	P04271	ng/mL	1	S100B	S100 calcium binding protein B	21	0	0	0
TIMP-1	Tissue Inhibitor of Metalloproteinases 1	P01033	ng/mL	1	TIMP1	TIMP metallopeptidase inhibitor 1	X	0	0	0
IgA	Immunoglobulin A		mg/mL	1				0	0	0
IgE	Immunoglobulin E		ng/mL	1				0	0	0
IGM	Immunoglobulin M		mg/mL	1				0	0	0
MDA-LDL	Malondialdehyde-Modified Low-Density Lipoprotein		ng/mL	1				0	0	0
Progesterone	Progesterone		ng/ml	1				0	0	0
Testosterone-Total	Testosterone, Total		ng/ml	1				0	0	0
*Analyte was mapped to more than one gene for association test.
**Initial annotation when the study started.
***Updated annotation while the manuscript was revised.
