# Supplementary material for: Influence of Genetic Variation on Plasma Protein Levels in Older Adults Using a Multi-Analyte Panel
Source: PLoS One. 2013 Jul 23;8(7):e70269. doi: 10.1371/journal.pone.0070269 (PMC3720913; doi:10.1371/journal.pone.0070269)
Supplement: Table S2 — Inclusion of covariates (baseline age, gender, education and handedness) in the model for each analyte in the ADNI cohort. Only significant (uncorrected p<0.05 on linear regression analyses, marked as “YES”) covariates were included in analyses. (XLSX) [file pone.0070269.s004.xlsx]

## Sheet: Sheet1
Analytes	gender	BL_Age	Education	Handedness
A1Micro	YES	YES	NO	NO
A2Macro	YES	YES	NO	NO
AACT	NO	YES	YES	YES
AAT	YES	NO	NO	NO
ACE	NO	NO	NO	NO
Adiponectin	YES	YES	NO	NO
AFP	YES	YES	NO	NO
ANG-2	NO	YES	NO	NO
Angiotensinogen	NO	NO	NO	NO
ApoA-I	YES	NO	YES	NO
ApoA-II	YES	YES	NO	YES
ApoA-IV	NO	NO	NO	NO
ApoB	NO	YES	NO	NO
ApoD	YES	NO	NO	NO
ApoE	YES	NO	NO	NO
ApoH	NO	YES	NO	NO
AXL	NO	NO	NO	NO
B2M	NO	YES	NO	YES
BDNF	YES	YES	YES	NO
BLC	NO	YES	NO	NO
BMP-6	NO	NO	NO	NO
BNP	NO	YES	NO	NO
BTC	NO	NO	NO	NO
C3	NO	NO	NO	NO
CA-19-9	NO	NO	NO	NO
Calcitonin	YES	NO	NO	NO
CD40	NO	YES	NO	NO
CD40-L*	N/A	YES	YES	NO
CD5L	YES	YES	NO	NO
CEA	NO	YES	NO	NO
CgA	YES	YES	NO	NO
CK-MB	YES	YES	NO	NO
CLU	YES	NO	NO	NO
CNTF	NO	NO	NO	NO
CompFactH	NO	NO	NO	NO
Cortisol	NO	YES	NO	NO
CRP	NO	NO	YES	NO
Cystatin-C	NO	YES	YES	YES
EGF	YES	YES	YES	NO
EGFR	YES	YES	NO	NO
ENA-78	YES	YES	NO	NO
Eotaxin-1	YES	YES	NO	NO
Eotaxin-3	NO	YES	NO	NO
E-Selectin	NO	YES	NO	NO
FABP-heart	YES	YES	NO	NO
FactorVII	YES	NO	NO	NO
FAS	YES	YES	YES	NO
FasL	NO	NO	NO	NO
Fetuin-A	NO	YES	NO	YES
FGF-4	NO	NO	YES	NO
Fibrinogen	NO	YES	NO	NO
FSH	YES	YES	NO	NO
GH	YES	YES	NO	NO
GRO-alpha	NO	YES	YES	NO
GST-alpha	NO	NO	YES	NO
Haptoglobin	NO	NO	NO	NO
HB-EGF	NO	YES	NO	NO
HCC-4	YES	NO	NO	NO
HGF	YES	YES	YES	YES
I-309	NO	NO	NO	NO
ICAM-1	NO	YES	NO	NO
IGFBP-2	NO	YES	NO	NO
IL-13	NO	YES	NO	NO
IL-16	NO	YES	YES	NO
IL-18	YES	NO	NO	NO
IL-3	NO	NO	YES	NO
IL-6r	NO	NO	NO	YES
IL-8	NO	YES	NO	NO
IP-10	NO	YES	NO	NO
KIM-1	NO	YES	NO	NO
Leptin	YES	NO	YES	NO
LH	YES	YES	NO	NO
LPa	YES	NO	NO	NO
MCP-1	NO	NO	NO	NO
MCP-2	NO	YES	NO	NO
MCP-3	NO	NO	NO	NO
MCP-4	NO	NO	NO	NO
M-CSF	YES	NO	NO	NO
MDC	YES	NO	NO	NO
MIF	NO	NO	YES	NO
MIG	YES	YES	NO	NO
MIP-1-alpha	NO	YES	NO	YES
MIP-1-beta	NO	NO	NO	NO
MIP-3-alpha	NO	NO	NO	NO
MMP-1	NO	NO	YES	NO
MMP-10	NO	NO	NO	NO
MMP-2	NO	YES	NO	NO
MMP-7	NO	YES	NO	NO
MMP-9	NO	NO	NO	NO
MMP-9-total	NO	NO	NO	NO
MPIF-1	NO	YES	NO	YES
MPO	NO	NO	NO	NO
Myoglobin	YES	YES	NO	YES
NGAL	YES	YES	NO	NO
Nr-CAM	NO	NO	NO	NO
Osteopontin	YES	YES	NO	NO
PAI-1	NO	YES	NO	NO
PAP	YES	NO	NO	NO
PAPP-A	YES	NO	NO	NO
PARC	NO	YES	YES	NO
PDGF-BB	YES	YES	NO	NO
PLGF	NO	YES	NO	NO
PPP	NO	YES	NO	NO
PRL	NO	YES	NO	NO
PYY	NO	NO	NO	NO
RAGE	YES	NO	NO	NO
RANTES	YES	YES	YES	NO
Resistin	NO	YES	NO	NO
SAP	YES	NO	NO	NO
SCF	NO	NO	NO	NO
SGOT	NO	NO	NO	NO
SHBG	YES	YES	NO	NO
SOD-1	NO	NO	YES	NO
Sortilin	YES	YES	NO	NO
TBG*	N/A	NO	YES	NO
TECK	YES	NO	NO	NO
TFF3	YES	YES	NO	NO
THP	YES	YES	YES	YES
Thrombopoietin	NO	NO	NO	NO
Thrombospondin-1	YES	NO	NO	NO
TM	YES	YES	NO	NO
TN-C	NO	YES	NO	NO
TNF-alpha	NO	YES	NO	NO
TNFR2	NO	YES	NO	NO
TRAIL-R3	NO	YES	NO	NO
Transferrin	YES	YES	NO	NO
TSH	NO	NO	NO	NO
TTR	NO	YES	NO	NO
VCAM-1	NO	YES	NO	NO
VEGF	NO	YES	NO	NO
VKDPS	NO	NO	NO	YES
vWF	NO	YES	NO	NO
*Association tests were performed separately for males and females.
