# Supplementary material for: Influence of Genetic Variation on Plasma Protein Levels in Older Adults Using a Multi-Analyte Panel
Source: PLoS One. 2013 Jul 23;8(7):e70269. doi: 10.1371/journal.pone.0070269 (PMC3720913; doi:10.1371/journal.pone.0070269)
Supplement: Table S3 — List of all significant (uncorrected p<2.44×10−5) associations in the ADNI cohort. The associations are sorted by chromosome and chromosomal location of each SNP. Percent of total variation explained by individual SNPs (R2 SNP) while adjusting for the effect of covariates is shown. R2 SNP is defined as follows: R2 SNP is defined as follows: R2 SNP = adjusted R2 of model with SNP and covariates – adjusted R2 of model with covariates. (XLSX) [file pone.0070269.s005.xlsx]

## Sheet: 2.44E-5
Analyte	Gene	Chr	SNP	Allele (Major/Minor)	Location*	Function_Class	GM**	R2SNP	beta	p-value
IL-6r	IL6R	1	rs6684439	C/T	154395839	Intron	ADD	0.355	0.1111	4.525e-52
IL-6r	IL6R	1	rs4553185	T/C	154410955	Intron	ADD	0.306	-0.1032	2.91e-44
IL-6r	IL6R	1	rs4845623	A/G	154415777	Intron	ADD	0.35	0.11	6.42e-52
IL-6r	IL6R	1	rs4537545	C/T	154418879	Intron	ADD	0.375	0.113	1.76e-56
IL-6r	IL6R	1	rs4129267	C/T	154426264	Intron	ADD	0.386	0.1151	1.564e-58
IL-6r	IL6R	1	rs4240872	T/C	154436195	Intron	ADD	0.12	-0.07604	1.343e-16
IL-6r	IL6R	1	rs7514452	T/C	154438084	3'UTR	ADD	0.061	-0.05893	5.308e-09
CD5L	CD5L	1	rs2765501	G/A	157804648	Intron	ADD	0.04	0.04652	1.516e-06
CompFactHᶧ	CFHᶧ	1	rs17573790	A/C	196609396	Intergenic	DOM	0.245	-1518	1.794e-33
CompFactHᶧ	CFHᶧ	1	rs3766404	T/C	196651832	Intron	ADD	0.422	-1480	1.482e-65
CompFactHᶧ	CFHᶧ	1	rs10801555	G/A	196660261	Intron	ADD	0.116	594.6	3.718e-16
CompFactHᶧ	CFHᶧ	1	rs10754199	G/A	196670839	Intron	ADD	0.124	608.7	1.336e-16
CompFactHᶧ	CFHᶧ	1	rs2019724	G/A	196674917	Intron	ADD	0.145	649	5.108e-20
CompFactHᶧ	CFHᶧ	1	rs6428357	G/A	196675571	Intron	ADD	0.145	649	5.108e-20
CompFactHᶧ	CFHᶧ	1	rs6677604	G/A	196686918	Intron	ADD	0.61	-1567	9.285e-112
CompFactHᶧ	CFHᶧ	1	rs379489	C/T	196693451	Intron	ADD	0.144	646.5	7.25e-20
CompFactHᶧ	CFHᶧ	1	rs419137	A/C	196696875	Intron	ADD	0.046	523.5	3.285e-07
CompFactHᶧ	CFHᶧ	1	rs1329428	G/A	196702810	Intron	ADD	0.323	-941.5	3.881e-47
CompFactHᶧ	CFHᶧ	1	rs1065489	G/T	196709774	Missense	ADD	0.061	538.6	5.444e-09
CompFactHᶧ	CFHᶧ	1	rs11582939	C/T	196710157	Intron	ADD	0.062	542.5	3.893e-09
CompFactHᶧ	CFHR1ᶧ	1	rs16840607	T/G	196823030	Intergenic	ADD	0.276	-943.029	5.71e-38
CompFactHᶧ	CFHR1ᶧ	1	rs7517126	A/G	196840272	Intergenic	ADD	0.397	-1487.46	1.46e-60
CompFactHᶧ	CFHR1ᶧ	1	rs13375144	C/T	196841690	Intergenic	ADD	0.397	-1487.46	1.46e-60
CompFactHᶧ	CFHR1ᶧ	1	rs12240143	T/C	196845017	Intergenic	ADD	0.289	-953.77	3.38e-41
CompFactHᶧ	CFHR1ᶧ	1	rs10801575	C/T	196852781	Intergenic	ADD	0.242	-870.691	5.83e-34
Angiotensinogen	AGT	1	rs7536290	A/G	230836702	Intergenic	ADD	0.081	0.4441	1.604e-11
Angiotensinogen	AGT	1	rs943580	A/G	230837044	Intergenic	ADD	0.065	0.292	1.992e-09
Angiotensinogen	AGT	1	rs2478523	T/C	230841509	Intron	ADD	0.078	0.3335	4.392e-11
Angiotensinogen	AGT	1	rs2478545	C/T	230844121	Intron	ADD	0.08	0.3752	2.505e-11
Angiotensinogen	AGT	1	rs699	T/C	230845794	Missense	ADD	0.059	0.2809	9.148e-09
Angiotensinogen	AGT	1	rs4762	C/T	230845977	Missense	DOM	0.136	0.6764	4.74e-18
Angiotensinogen	AGT	1	rs2493134	T/C	230849359	Intron	ADD	0.059	0.2809	9.148e-09
Angiotensinogen	AGT	1	rs2493137	T/C	230852116	5' near gene	ADD	0.054	0.2831	3.734e-08
Fetuin-A	AHSG	3	rs6788635	G/A	186328121	Intergenic	ADD	0.164	-0.06476	4.396e-23
Fetuin-A	AHSG	3	rs2593813	T/C	186332571	Intron	ADD	0.218	-0.06654	5.616e-31
Fetuin-A	AHSG	3	rs2070633	C/T	186335941	Intron	ADD	0.219	-0.06065	4.497e-31
Fetuin-A	AHSG	3	rs4917	C/T	186337713	Missense	ADD	0.206	-0.06589	3.579e-29
Fetuin-A	AHSG	3	rs13098866	A/G	186339707	Intergenic	ADD	0.139	0.0487	1.499e-19
Fetuin-A	AHSG	3	rs4498037	C/T	186341263	Intergenic	ADD	0.155	-0.06483	8.919e-22
Fetuin-A	AHSG	3	rs13073106	T/C	186342060	Intergenic	ADD	0.204	-0.06534	6.818e-29
AFP	AFP	4	rs10020432	G/A	74321600	3' nearGene	ADD	0.032	-0.07302	2.261e-05
GST-alpha	GSTA1	6	rs2397105	A/G	52653324	Intergenic	ADD	0.053	-0.1277	6.582e-08
GST-alpha	GSTA1	6	rs4715326	T/C	52657552	Intron	ADD	0.059	-0.135	1.178e-08
LPa	LPA	6	rs13202636	T/C	161029728	Intron	ADD	0.048	-0.2231	2.273e-07
EGFR	EGFR	7	rs4947978	C/A	55186456	intron	ADD	0.031	0.2302	1.957e-05
EGFR	EGFR	7	rs13244925	C/A	55192256	Intron	ADD	0.041	0.2447	9.122e-07
EGFR	EGFR	7	rs12666347	A/T	55205930	Intron	ADD	0.03	-0.223	2.04e-05
EGFR	EGFR	7	rs2241054	G/A	55239979	Intron	ADD	0.033	0.2652	9.557e-06
EGFR	EGFR	7	rs845558	G/A	55247588	intron	ADD	0.03	-0.2238	2.065e-05
Nr-CAM	NRCAM	7	rs2267882	T/C	107948721	Intron	ADD	0.042	0.04659	1.483e-06
Nr-CAM	NRCAM	7	rs2267887	A/G	107968803	intron	ADD	0.039	-0.04271	3.196e-06
Nr-CAM	NRCAM	7	rs10487849	T/C	107987085	Intron	ADD	0.058	0.05474	1.36e-08
Nr-CAM	NRCAM	7	rs17334792	A/G	107990819	Intron	ADD	0.056	0.05161	2.569e-08
Nr-CAM	NRCAM	7	rs2300033	T/C	108006941	Intron	ADD	0.057	0.05211	1.959e-08
FAS	FAS	10	rs3740286	T/C	90751340	intron	ADD	0.033	0.03404	1.188e-05
FAS	FAS	10	rs1571011	A/C	90757787	Intron	ADD	0.045	0.03911	3.195e-07
FAS	FAS	10	rs1977389	A/C	90773494	Intron	ADD	0.038	0.03673	2.626e-06
ApoA-IV	APOA4	11	rs1263167	A/G	116677723	Intergenic	ADD	0.223	-0.1447	6.836e-31
FactorVII	F7	13	rs555212	G/A	113756540	Intergenic	ADD	0.043	0.05788	5.352e-07
FactorVII	F7	13	rs488703	C/T	113770876	Intron	DOM	0.054	-0.09773	1.997e-08
AAT	SERPINA1	14	rs7151526	C/A	94863636	Intergenic	DOM	0.043	-0.06284	7.443e-07
IL-16	IL16	15	rs11857713	C/T	81591265	Intron	DOM	0.096	-0.1499	1.206e-13
IL-16	IL16	15	rs4778636	G/A	81591639	Intron	DOM	0.136	-0.1585	5.084e-19
THP	UMOD	16	rs11647727	G/A	20356165	Intron	ADD	0.109	-0.1016	4.781e-16
THP	UMOD	16	rs4506906	T/C	20357398	Intron	ADD	0.075	-0.07501	2.005e-11
THP	UMOD	16	rs4293393	T/C	20364588	5' near gene	ADD	0.192	-0.1532	2.477e-28
THP	UMOD	16	rs13333226	A/G	20365654	5' near gene	ADD	0.19	-0.1502	5.209e-28
MCP-2	CCL8	17	rs3848464	C/T	32639369	Intergenic	DOM	0.068	-0.0884	9.833e-10
MCP-2	CCL8	17	rs12602687	G/A	32640209	Intergenic	DOM	0.074	-0.09275	2.335e-10
MCP-2	CCL8	17	rs3138036	A/G	32647544	Intron	DOM	0.085	-0.08898	7.994e-12
MCP-2	CCL8	17	rs1133763	A/C	32647831	Missense	DOM	0.084	-0.08866	1.265e-11
MCP-2	CCL8	17	rs12602195	A/G	32660149	Intergenic	ADD	0.09	-0.07943	2.397e-12
HCC-4	CCL16	17	rs4796144	G/A	34293003	Intergenic	DOM	0.099	-0.2088	1.07e-13
HCC-4	CCL16	17	rs2063979	A/G	34303566	3'UTR	ADD	0.034	-0.05738	1.234e-05
HCC-4	CCL16	17	rs11080369	A/C	34305164	Intron	DOM	0.138	-0.2177	8.025e-19
MPIF-1	CCL23	17	rs854656	A/C	34345661	5' near gene	ADD	0.095	-0.06905	2.605e-13
PARC	CCL18	17	rs972317	A/C	34371659	Intergenic	DOM	0.127	0.1435	1.981e-20
PARC	CCL18	17	rs854462	T/C	34386090	Intergenic	DOM	0.148	0.1458	9.146e-24
PARC	CCL18	17	rs1467288	C/T	34389418	Intergenic	DOM	0.069	0.1117	1.68e-11
ACE	ACE	17	rs4305	G/A	61558229	Intron	ADD	0.134	0.08219	2.89e-18
ACE	ACE	17	rs4309	C/T	61559923	cds-synon	ADD	0.154	-0.08904	5.533e-21
ACE	ACE	17	rs4311	C/T	61560763	Intron	ADD	0.139	0.08388	6.857e-19
ACE	ACE	17	rs4329	A/G	61563458	Intron	ADD	0.188	-0.09812	1.487e-25
ACE	ACE	17	rs4343	G/A	61566031	cds-synon	ADD	0.205	-0.1019	5.203e-28
ACE	ACE	17	rs4353	A/G	61570422	Intron	ADD	0.19	-0.09871	7.606e-26
ACE	ACE	17	rs4362	T/C	61573761	cds-synon	ADD	0.201	-0.1012	1.991e-27
ACE	ACE	17	rs4461142	C/T	61578048	Intergenic	ADD	0.16	0.08885	9.938e-22
ACE	ACE	17	rs4267385	T/C	61583756	intergenic	ADD	0.047	-0.04818	3.615e-07
ACE	ACE	17	rs8066276	C/T	61589265	Intergenic	ADD	0.038	-0.04397	4.13e-06
ACE	ACE	17	rs12451328	C/A	61596548	intergenic	ADD	0.058	0.05387	1.412e-08
ApoH	APOH	17	rs11651658	T/C	64198640	Intergenic	DOM	0.058	-62.53	6.39e-09
ApoH	APOH	17	rs758767	C/T	64204591	Intergenic	ADD	0.039	-32.58	1.481e-06
ApoH	APOH	17	rs8178847	G/A	64216815	Missense	DOM	0.07	-68.38	1.195e-10
ApoH	APOH	17	rs8178842	G/A	64218640	Intron	DOM	0.066	-63.81	1.516e-09
ApoH	APOH	17	rs8178841	C/T	64219197	Intron	DOM	0.071	-68.56	1.075e-10
ICAM-1	ICAM1	19	rs1799969	G/A	10394792	Missense	DOM	0.045	-0.0791	1.027e-06
ApoE***	APOE	19	rs405509	A/C	45408836	5' near gene	ADD	0.03	0.0471	1.484e-05
ApoE***	APOE	19	rs429358	T/C	45411941	Missense	ADD	0.196	-0.1246	7.269e-30
Cystatin-C	CST3	20	rs2145231	G/A	23625547	Intergenic	ADD	0.028	-0.03679	1.815e-05
Cystatin-C	CST3	20	rs2424590	T/C	23636980	Intergenic	ADD	0.032	-0.03933	4.752e-06
CD40	CD40	20	rs6065925	G/A	44734296	Intergenic	ADD	0.038	0.03858	8.987e-07
CD40	CD40	20	rs6131015	G/A	44737650	Intergenic	ADD	0.035	0.03676	2.605e-06
CD40	CD40	20	rs6074022	T/C	44740196	Intergenic	ADD	0.079	-0.05382	4.126e-12
CD40	CD40	20	rs1569723	A/C	44742064	Intergenic	ADD	0.088	-0.05683	9.609e-14
CD40	CD40	20	rs6074024	A/G	44743310	Intergenic	ADD	0.032	0.03533	6.376e-06
CD40	CD40	20	rs3746821	G/T	44755111	Intron	DOM	0.057	-0.07292	2.327e-09
CD40	CD40	20	rs1883833	G/A	44765458	Intergenic	ADD	0.041	0.03535	4.439e-07
CD40	CD40	20	rs16991114	A/G	44767100	Intergenic	DOM	0.044	-0.06731	1.289e-07
CD40	CD40	20	rs6074037	C/T	44769666	Intergenic	ADD	0.034	0.03229	4.105e-06
CD40	CD40	20	rs6032678	C/T	44777295	Intergenic	ADD	0.03	0.0304	1.368e-05
TBGᶧᶧ	SERPINA7	X	rs1804495	G/T	105278361	missense	HEM	0.137	-0.11242	1.24e-12
TBGᶧᶧ	SERPINA7	X	rs5916968	G/A	105311217	Intergenic	HEM	0.136	-0.112155	1.46e-12
*Gene and SNP information are based on the Genome Build 37.3.
**Tested genetic model: Additive (ADD), Dominant (DOM), Hemizygosity (HEM).
***Statistical model did not include APOE e4 status due to possible collinearity.
ᶧGene-protein pairs in the initial and updated annotation are shown together.
ᶧᶧAssociation was significnat only in males.
