# Supplementary material for: Influence of Genetic Variation on Plasma Protein Levels in Older Adults Using a Multi-Analyte Panel
Source: PLoS One. 2013 Jul 23;8(7):e70269. doi: 10.1371/journal.pone.0070269 (PMC3720913; doi:10.1371/journal.pone.0070269)
Supplement: Table S4 — List of all replicated (uncorrected p<0.05) associations in the IMAS cohort. The associations are sorted by chromosome and chromosomal location of each SNP. Percent of total variation explained by individual SNPs (R2 SNP) while adjusting for the effect of covariates is shown. R2 SNP is defined as follows: R2 SNP = adjusted R2 of model with SNP and covariates – adjusted R2 of model with covariates. (XLSX) [file pone.0070269.s006.xlsx]

## Sheet: 0.05
Analyte	Gene	Chr	SNP	Allele (Major/Minor)	Location*	Function_Class	GM**	R2SNP	beta	p
IL-6r	IL6R	1	rs6684439	C/T	154395839	Intron	ADD	0.171958	4.77442	0.000253
IL-6r	IL6R	1	rs4553185	T/C	154410955	Intron	ADD	0.137731	-4.76659	0.00109
IL-6r	IL6R	1	rs4845623	A/G	154415777	Intron	ADD	0.171879	4.72597	0.000253
IL-6r	IL6R	1	rs4537545	C/T	154418879	Intron	ADD	0.171879	4.72597	0.000253
IL-6r	IL6R	1	rs4129267	C/T	154426264	Intron	ADD	0.181133	4.86195	0.000169
IL-6r	IL6R	1	rs7514452	T/C	154438084	3'UTR	DOM	0.056147	-4.62718	0.0299
CD5L	CD5L	1	rs2765501	G/A	157804648	Intron	ADD	0.119094	597.091	0.00646
CompFactHᶧ	CFHᶧ	1	rs17573790	A/C	196609396	Intergenic	DOM	0.095409	-1049.14	0.00956
CompFactHᶧ	CFHᶧ	1	rs3766404	T/C	196651832	Intron	DOM	0.136347	-1058.34	0.00218
CompFactHᶧ	CFHᶧ	1	rs6677604	G/A	196686918	Intron	DOM	0.27962	-1360.29	7.5e-06
CompFactHᶧ	CFHᶧ	1	rs1329428	C/T	196702810	Intron	ADD	0.056058	-448.043	0.0388
CompFactHᶧ	CFHR1ᶧ	1	rs16840607	T/G	196823030	Intergenic	ADD	0.250575	-979.905	2.57e-05
CompFactHᶧ	CFHR1ᶧ	1	rs7517126	A/G	196840272	Intergenic	DOM	0.170988	-1212.74	0.000601
CompFactHᶧ	CFHR1ᶧ	1	rs13375144	C/T	196841690	Intergenic	DOM	0.170988	-1212.74	0.000601
CompFactHᶧ	CFHR1ᶧ	1	rs12240143	T/C	196845017	Intergenic	ADD	0.250575	-979.905	2.57e-05
CompFactHᶧ	CFHR1ᶧ	1	rs10801575	C/T	196852781	Intergenic	ADD	0.219283	-896.653	9.22e-05
Fetuin-A	AHSG	3	rs6788635	G/A	186328121	Intergenic	DOM	0.048368	-195.436	0.0486
Fetuin-A	AHSG	3	rs2593813	A/G	186332571	Intron	ADD	0.051612	-130.742	0.0431
Fetuin-A	AHSG	3	rs2070633	C/T	186335941	Intron	ADD	0.115997	-181.751	0.00406
Fetuin-A	AHSG	3	rs4917	C/T	186337713	Missense	ADD	0.100736	-171.732	0.00714
Fetuin-A	AHSG	3	rs4498037	C/T	186341263	Intergenic	DOM	0.093427	-252.243	0.00934
Fetuin-A	AHSG	3	rs13073106	T/C	186342060	Intergenic	ADD	0.100736	-171.732	0.00714
ApoA-IV	APOA4	11	rs1263167	A/G	116677723	Intergenic	DOM	0.066038	-4.3601	0.0342
FactorVII	F7	13	rs488703	G/A	113770876	Intron	DOM	0.046882	-118.177	0.042
IL-16	IL16	15	rs11857713	C/T	81591265	Intron	DOM	0.105932	-76.17	0.00701
IL-16	IL16	15	rs4778636	G/A	81591639	Intron	DOM	0.123021	-74.1037	0.00383
HCC-4	CCL16	17	rs4796144	G/A	34293003	Intergenic	DOM	0.154175	-2.27939	0.00249
HCC-4	CCL16	17	rs11080369	A/C	34305164	Intron	DOM	0.182766	-2.41036	0.00101
PARC	CCL18	17	rs972317	T/G	34371659	Intergenic	DOM	0.255023	64.0786	6.23e-05
PARC	CCL18	17	rs854462	A/G	34386090	Intergenic	DOM	0.245844	61.7388	8.67e-05
PARC	CCL18	17	rs1467288	G/A	34389418	Intergenic	DOM	0.098531	50.4987	0.0122
ACE	ACE	17	rs4305	G/A	61558229	Intron	ADD	0.147035	21.3755	0.00264
ACE	ACE	17	rs4309	C/T	61559923	cds-synon	ADD	0.172163	-22.8516	0.00116
ACE	ACE	17	rs4311	C/T	61560763	Intron	ADD	0.189926	25.6889	0.00064
ACE	ACE	17	rs4329	A/G	61563458	Intron	ADD	0.26246	-28.0879	5.09e-05
ACE	ACE	17	rs4343	G/A	61566031	cds-synon	ADD	0.278238	-29.2261	2.86e-05
ACE	ACE	17	rs4353	A/G	61570422	Intron	ADD	0.278238	-29.2261	2.86e-05
ACE	ACE	17	rs4362	T/C	61573761	cds-synon	ADD	0.278238	-29.2261	2.86e-05
ACE	ACE	17	rs4461142	C/T	61578048	Intergenic	ADD	0.107477	18.7828	0.00942
ApoH	APOH	17	rs11651658	T/C	64198640	Intergenic	DOM	0.148858	-62.9912	0.00264
ApoH	APOH	17	rs758767	G/A	64204591	Intergenic	DOM	0.081589	-44.4601	0.022
ApoH	APOH	17	rs8178847	C/T	64216815	Missense	DOM	0.129325	-54.3587	0.00492
ApoH	APOH	17	rs8178842	C/T	64218640	Intron	DOM	0.129325	-54.3587	0.00492
ApoH	APOH	17	rs8178841	G/A	64219197	Intron	DOM	0.129325	-54.3587	0.00492
CD40	CD40	20	rs6065925	G/A	44734296	Intergenic	DOM	0.057833	0.094399	0.0352
CD40	CD40	20	rs6131015	G/A	44737650	Intergenic	DOM	0.057833	0.094399	0.0352
CD40	CD40	20	rs6074024	A/G	44743310	Intergenic	DOM	0.057833	0.094399	0.0352
CD40	CD40	20	rs1883833	G/A	44765458	Intergenic	ADD	0.117825	0.088806	0.00397
CD40	CD40	20	rs6074037	C/T	44769666	Intergenic	ADD	0.109357	0.085523	0.00542
CD40	CD40	20	rs6032678	C/T	44777295	Intergenic	ADD	0.131673	0.089162	0.00238
*Gene and SNP information are based on the Genome Build 37.3.
**Tested genetic model: Additive (ADD), Dominant (DOM)
ᶧGene-protein pairs in the initial and updated annotation are shown together.
